# Supplementary material for: Circular RNA circMYL1 Inhibit Proliferation and Promote Differentiation of Myoblasts by Sponging miR-2400
Source: PubMed Central journal article supplement (PMC7830797; doi:10.3390/cells10010176), 2021-01-16
Supplement: cells-10-00176-s001.pdf [file cells-10-00176-s001.pdf]

### Supplemental Information

**Table S1. Primers for qPCR**

| Name                        | Forward primer 5'→3'                               | Reverse primer 5'→3'     |
|-----------------------------|----------------------------------------------------|--------------------------|
| CircMYL1                    | AAGAAGAAGTGGAAGCGCTGA                              | TGCCCTGGTCCTTGTTGTTGG    |
| Bta-miR-2400                | TCGCCAGCACAGGCAGCTCG                               | GCAGGGTCCGAGGTATTC       |
| Bta-miR-2400-RT             | GTCGTATCCAGTGCAGGGTCCGAGGTATTCGCACTGGATACGACTCAGTC |                          |
| U6                          | GGAAGAGGGCCTATTTCCCAT                              | CCCAACTTCTCGGGGACTGTG    |
| GAPDH                       | TGAGGACCAGGTTGTCTCCTGCG                            | CACCACCCTGTTGCTGTAGCCA   |
| MYOD                        | CCCAAAGATTGCGCTTAAGTG                              | GTTCCCTTCGCCTCTCCTACCT   |
| MYOG                        | AGGGGATCATCTGCTCCCAG                               | ATCCCGGCAGACAATCTCAG     |
| MYH2                        | CTGAATCCCAGGTCAACAAG                               | TCATCCCATAGCATCAGGAC     |
| PCNA                        | GTCAGGAGTCAACCAAGAAAG                              | CTGTCAGTCTCCTTCCCTAAC    |
| CDK2                        | TTTGCTGAGATGGTGACCCG                               | TAACTCCTGGCCAAACCACC     |
| CyclinD1                    | GACGAGCTGCTGCACATGGA                               | TGCTTGTTCTCCTCGGCCAC     |
| MYL1                        | TGTCCAAATCTGTTTACCATC                              | ACTTAGTTTGTGTGGTATGAA    |
| CircMYL1. convergent primer | TGCGTGTCTTCGACAAGGAA                               | TTTCATCTTTTCACCTAGTGTGGC |

**Table S2. Primers for vector construction**

| <b>Name</b>                 | <b>Primer sequence 5' →3'</b>                      |
|-----------------------------|----------------------------------------------------|
| PCD2.1-circMYL1-F           | CGGGATCCCTTTGTTGAGGGTCTGCGTGT                      |
| PCD2.1-circMYL1-R           | GGGGTACCTCTTCATAAGTGCCCTGGTCC                      |
| psiCHECK2-circMYL1-F        | CCGCTCGAGCTTTGTTGAGGGTCTGCGTGT                     |
| psiCHECK2-circMYL1-R        | ATAAGAATGCGGCCGCTCTTCATAAGTGCCCTGGTCC              |
| psiCHECK2-miR-2400-Sensor-F | TCGATCAGTCCGAGCTGCCTGTGCTGGTCAGTCCGAGCTGCCTGTGCTGG |
| psiCHECK2-miR-2400-Sensor-R | GGCCCCAGCACAGGCAGCTCGGACTGACCAGCACAGGCAGCTCGGACTGA |
| psiCHECK2-MYOG-W-F          | CCGCTCGAGGCCTGCCCTGAATTGAGATGA                     |
| psiCHECK2-MYOG-W-R          | ATAAGAATGCGGCCGCATCCCTGGCAACTTCAGCAC               |
| psiCHECK2-MYOG-MUT -F       | CCGCTCGAGATCTGACCAAGGTCTCTGACGTGAAGTTGC            |
| psiCHECK2-MYOG-MUT -R       | ATAAGAATGCGGCCGCCTAGCACCCAGTCTTTATTT               |

**Text S1. Sequence of cattle circMYL1**

>circRNA2388

AGATGAATGCCAAGAAAATTGAGTTTGAACAATTTCTGCCCATGTTGCAAGCTATTT  
CCAACAACAAGGACCAGGGCACTTATGAAGACTTTGTTGAGGGTCTGCGTGTCTTCG  
ACAAGGAAGGCAATGGCACCGTCATGGGTGCTGAACTTCGTCATGTTCTAGCCACAC  
TAGGTGAAAAGATGAAAGAAGAAGAAGTGGAAGCGCTGATGGCAGGTCAGGAAGA  
CTCCAATGGCTGCATCAACTATGAAG
